# Supplementary material for: Pseudo-acetylation of multiple sites on human Tau proteins alters Tau phosphorylation and microtubule binding, and ameliorates amyloid beta toxicity
Source: PubMed Central journal article supplement (PMC5577152; doi:10.1038/s41598-017-10225-0), 2017-08-30
Supplement: 41598_2017_10225_MOESM1_ESM.pdf [file 41598_2017_10225_MOESM1_ESM.pdf]

## Supplementary Figures

**Pseudo-acetylation of multiple sites on human Tau proteins alters Tau phosphorylation and microtubule binding, and ameliorates amyloid beta toxicity.**

Marianna Karina Gorsky<sup>1\*</sup>, Sylvie Burnouf<sup>1\*</sup>, Oyinkan Sofola-Adesakin<sup>2\*</sup>,  
Jacqueline Dols<sup>1</sup>, Hrvoje Augustin<sup>1,2,,</sup>, Carina Marianna Weigelt<sup>1</sup>,  
Sebastian Grönke<sup>1</sup> and Linda Partridge<sup>1,2\*\*</sup>

<sup>1</sup>Max Planck Institute for Biology of Ageing, Joseph-Stelzmann-Strasse 9b, 50931 Cologne, Germany; CECAD Cologne Excellence Cluster on Cellular Stress Responses in Aging Associated Diseases, 50931 Cologne, Germany.

<sup>2</sup>Institute of Healthy Ageing, Department of Genetics, Evolution and Environment, University College London, Darwin Building, Gower Street, London, WC1E 6BT, UK.

\*Authors contributed equally to this manuscript

\*\*Correspondence should be addressed to L. P.

(Linda.Partridge@age.mpg.de; Telephone: 0049(0)221-37970602; Fax: 0049(0)221-3797088602).

# Supplementary Figure-1-Partridge. Genomic engineering of the fly *tau* locus

**a**

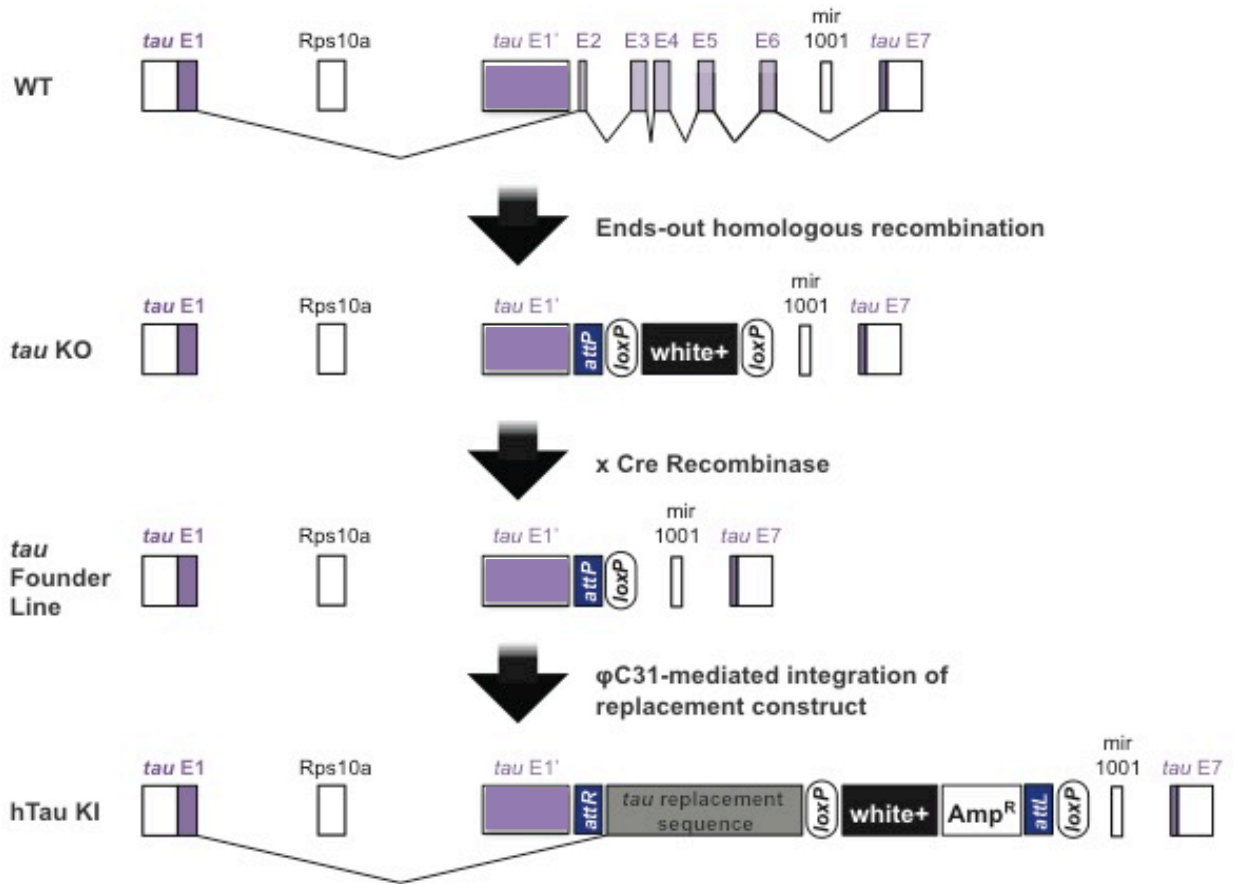

**b**

GAATTCAGTTTATTTTAAATTTAACTATCTCAATATGATTCATGATATATCCATCCATGCCTCCCTCATGTATCTTTGGTTATTTTCAGAGAT  
GGCTGAGCCCCGCCAGGAGTTCGAAGTGATGGAAGATCACGCTGGGACGTACGGGTTGGGGGACAGGAAAGATCAGGGGGGCTAC  
ACCATGCACCAAGACCAAGAGGGTGACACGGACGCTGGCCTGAAAGAATCTCCCTGCAGACCCCCACTGAGGACGGATCTGAGGA  
ACCGGGCTCTGAAACCTCTGATGCTAAGAGCACTCCAACAGCGGAAGATGTGACAGCACCCCTTAGTGGATGAGGGAGCTCCCGGCA  
AGCAGGCTGCCGCGCAGCCCCACAGCGGATCCCAGAAGGAACACAGCTGAAGAAGCAGGCATTGGAGACACCCCCAGCCTGGA  
AGCAAGCTGCTGGTCACGTGACCCAGCTGCATGGTCAGTAAAGCAAGACGGGACTGGAAGCGATGACAAAAAGCCAAAG  
GGGGCTGATGGTAAACGAAGATCGCCACACCGCGGGGAGCAGCCCTCCAGGCCAGAAAGGGCCAGGCCAACCCACCAGGATTC  
CAGCAAAAACCCCGCCGCTCCAAAGACACCACCCAGCTCTGGTGAACCTCCAAAATCAGGGGATCGCAGCGGCTACAGCAGCCCC  
GGCTCCCAAGCACTCCCGCAGCCGCTCCCGCACCCCGTCCCTTCCAACCCACCACCCGGGAGCCCAAGAAGGTGGCAGTGG  
TCCGTAATCCACCAAGTCGCGCTTCCGCAAGAGCCGCTGCAGACAGCCCCGTCGCCATGCCAGACCTGAAGAATGTCAAGT  
CCAAGATCGGCTCCACTGAGAACCTGAAGCACCAGCCGGGAGCGGGAAGGTGCAGATAATTAATAAGAAGCTGGATCTTAGCAAC  
GTCCAGTCCAAGTGTGGCTCAAAGGATAATATCAAACACGTCCCGGGAGGCGGCAGTGTGCAAAATAGTCTACAAACCAGTTGACCTG  
AGCAAGGTGACCTCCAAGTGTGGCTCATTAGGCAACATCCATCATAAACCAGGAGGTGGCCAGGTGGAAGTAAATCTGAGAAGCTT  
GACTTCAAGGACAGAGTCCAGTCAAGATTGGGTCCCTGGACAATATCACCCACGTCCCTGGCGGAGGAAATAAAAGATTGAAACC  
CACAAGCTGACCTTCGCGGAGAACGCCAAAGCCAAGACAGACACCCGCGGAGATCGTGTACAACTCGCCAGTGGTGTCTGGGG  
ACAGTCTCCACGGCATCTCAGCAATGTCTCCACCCGAGCATCGACATCGGTAGACTCGCCCCAGCTCGCCAGCTGACTGACG  
AGGTGCTGCCTCCCTGGCCAAAGCAGGGTTGTAGATGCCGAAATGCATGTGAGCTGTATCTGAAACTGAATCTGAAACTGACTCTTTC  
TTTGCAAGCTAAGATCAACAAAAGTGAATATGAGCAGCTAATTTGAAACGTAATCTAAGCAAAATCCACACAATGCAAAACGAGAGTTA  
TGCATAATTTCCACACACCCAGATAATTCACAAGCCAGTAAATGCGATCAGATCAATTCGATAGAGGTGCAAGCACGCAATGAGATGCAG  
ATACTCGTACATCTACACAACACCCACATAGAAGCGGTATTTGGTATACAATCGAAAGATATTTGACTAGTTGAGCAATGCATCTTTAT  
CATCAGATAGCAGACATGAATATATATCTCAATGATTACCAGAATCTCATATACATACATAAATCTATATATATATATATATAAATAA  
AGTATCTAAATATTTAAGCAAATTATACAAGAAACGTCAGAAATAAGTATGCTTAGTTGAAATGTTAGTAAACTACGTGTACATAAGCTCA  
AAGTAGTTACGTATGATATCTAGAAATTAGCATTAAACCCTGATTTACTAGACTCTTTATTTGATTAAGAAAGCAACCAAAAGTAATCGATAC  
GAGTATATTACAAACATCTATTATCGCTATCCATTTGTGTTACGTCGAGAAATTCATTTTATGTAATCTGTAATGGTAATCAATTACGTTG  
CATTTTCGATTAACACTCATTATTTAATATGCAACTAACAGAGCACCACACCCCAAAAGAGGCCCCACACAACACCCCAACCAACCA  
CCACCCACAGACACGCCCCGACCCGCTTTTCAGATAACTCTCAACACTCCCAAGATCAATCCGTTTAAAGGGGAATGTGATTATA  
AGAACTAACAAATTGGACAACGTATTTGGACATCTAGGCATCGAATTGATTTTATTGGGCACTTCGTGACTTTTATCAGATGAGCCAC  
CGAAATCTTTAGAGATTTGAAACCATCTATGAAGTGTCTAAAAGTATGCTTTGAAAAATAGAAAGTAGCTGCATACCTTTAGACATTTGTTGA  
AGTGATTGCAAACTCTTGAAGTCCGTAGCTACCATTGATTATTTGTTTTGATTTAGATGATTTATTGATTATCTATTGGTTCTCAG  
TTCAATTACACTTACTTTACATTTAAATGAATTTCTTCAAACCTCAAACCTGAGATTCATTGGCAACAGCGCTTTCCATCTCGAG

HUMAN TAU 2N4R cDNA / K163, 280, 281 and 369 / DROSOPHILA TAU RECONSTITUTION SEQUENCES

# Supplementary Figure-2-Partridge. Amino acid sequence of the hTau KI fusion protein.

MADVLEKSSLLDAVPPLGDPHPPLPHQQLQQEAAAAAAAAANAAPPA  
PPQQQQPPPHQLQQQQPQQQQLQQKPANARANQDQKEMAEP  
QEFVEMEDHAGTYGLGDRKDQGGYTMHQDQEGDTDAGLKESPL  
QTPTEDGSEEPGSETSDAKSTPTAEDVTAPLVDEGAPGKQAAAQ  
PHTEIPEGTTAEEAGIGDTPSLEDEAAGHVTQARMVSKSKDGTGS  
DDKKAKGADGKTKIATPRGAAPPGQ**K**GQANATRIPAKTPPAPKTP  
**163**  
PSSGEPPKSGDRSGYSSPGSPGTPGSRSRTPSLPTPPTREPKKV  
AVVRTPPKSPSSAKSRLQTAPVPMPLKKNVKSIGSTENLKHQPG  
GGKVQIIN**KK**LDLSNVQSKCGSKDNIKHVPGGGSVQIVYKPVDLS  
**280 281**  
KVTSKCGSLGNIHHKPGGGQVEVKSEKLDKDFKDRVQSKIGSLDNIT  
HVPGGGN**K**KIETHKLTFRENA KAKTDHGAEIVYKSPVVSGDTSR  
**369**  
HLSNVSSTGSIDMVDSPQLATLADEV SASLAKQGL

DROSOPHILA TAU E1 (82 amino acids)

HUMAN TAU 2N4R (441 amino acids)

**LYSINES 163, 280, 281 and 369**

Predicted molecular weight: 54.67 kDa

Apparent molecular weight on SDS-PAGE: 80 kDa

Supplementary Figure-3-Partridge. hTau KI proteins were expressed in brains of adult flies.

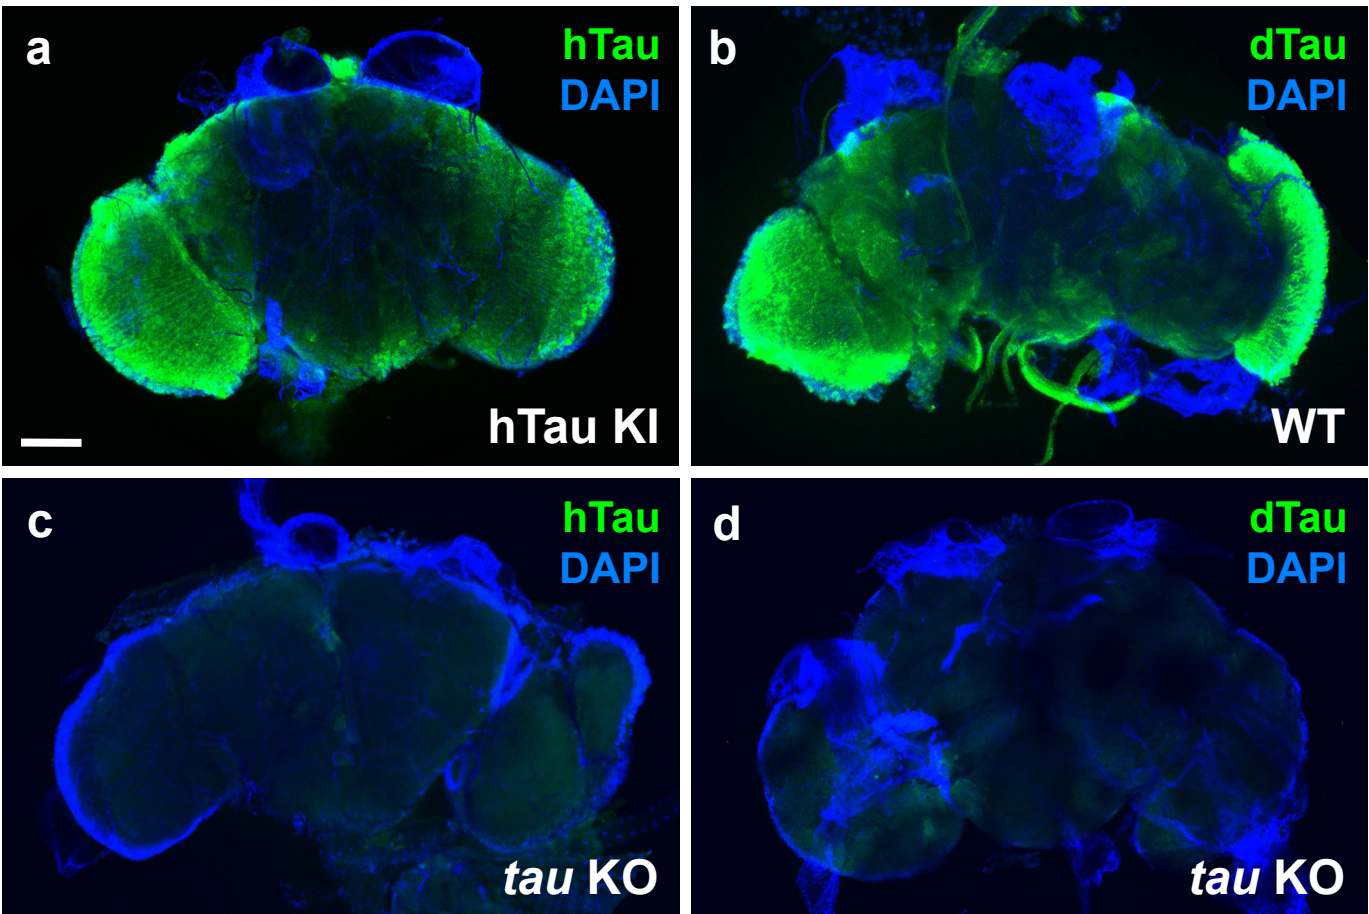

Supplementary Figure-4-Partridge. Control experiments for hTau immunofluorescence on fly embryos.

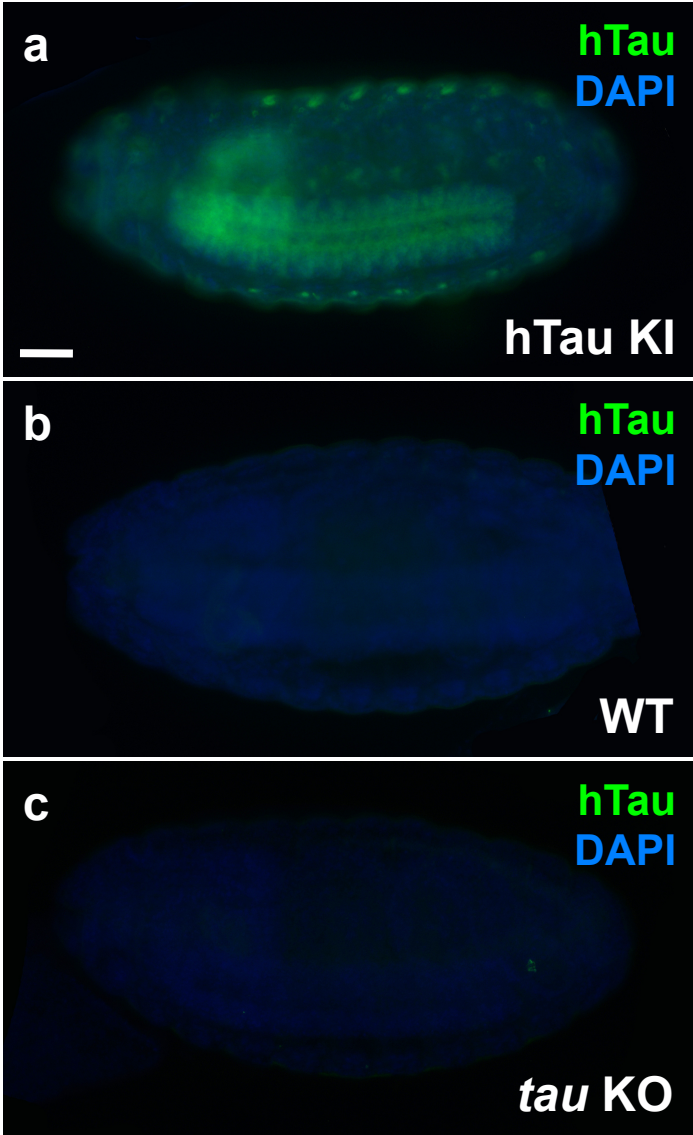

# Supplementary Figure-5-Partridge. Neuronal and synaptic protein levels were not altered in hTau KI flies.

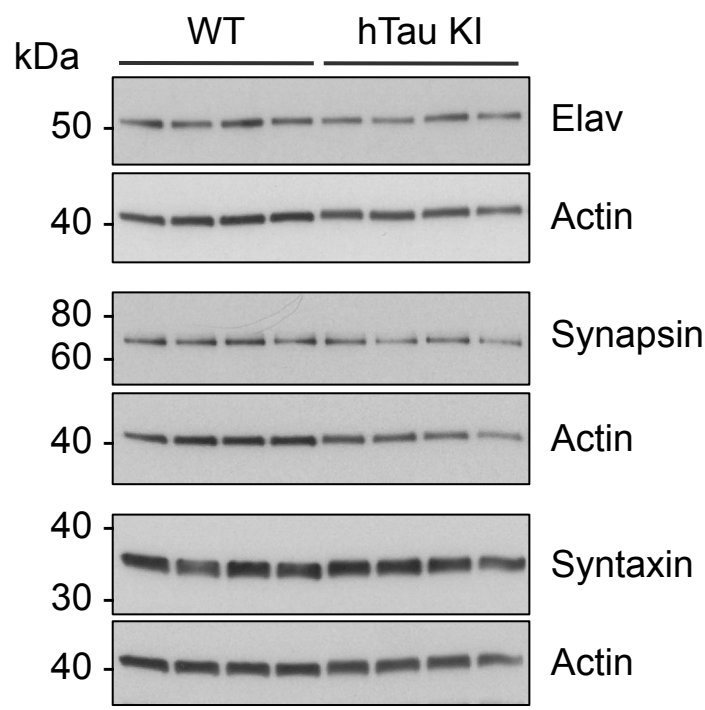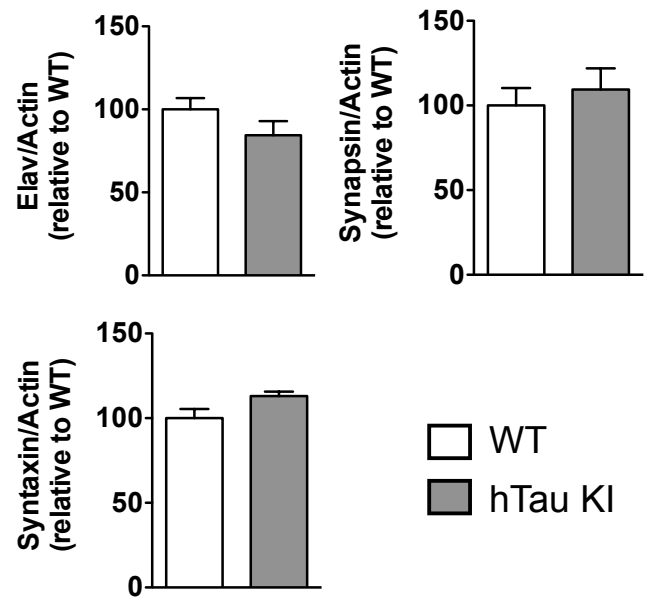

Supplementary Figure-6-Partridge. Schematic representation of hTau acetylation and phosphorylation sites investigated in this study.

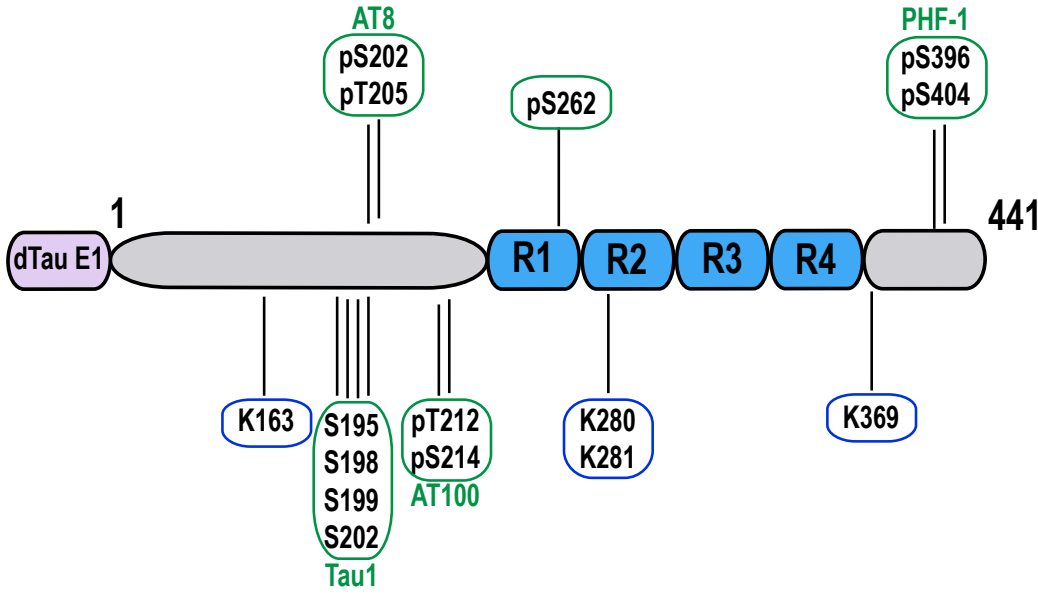

Supplementary Figure-7-Partridge. hTau mRNA levels were comparable in all hTau KI lines.

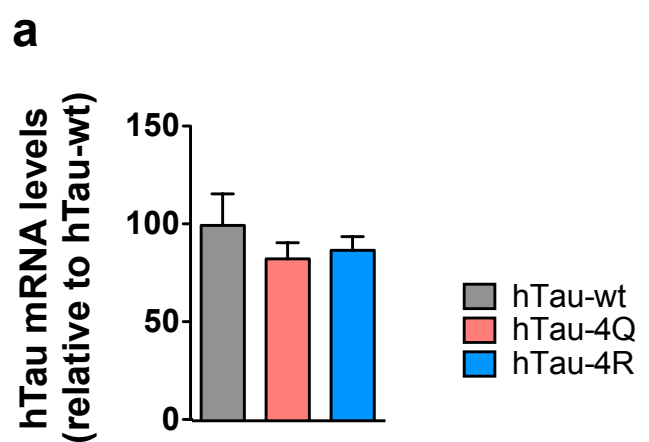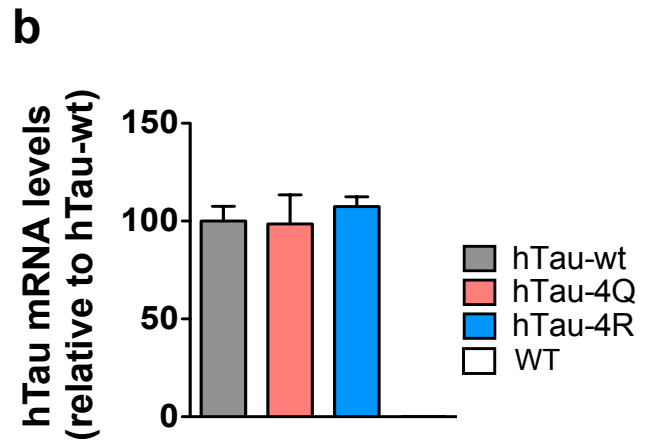



Supplementary Figure-8-Partridge. Imaging of hTau expression in hTau-wt, -4Q and -4R embryos and adult brains.

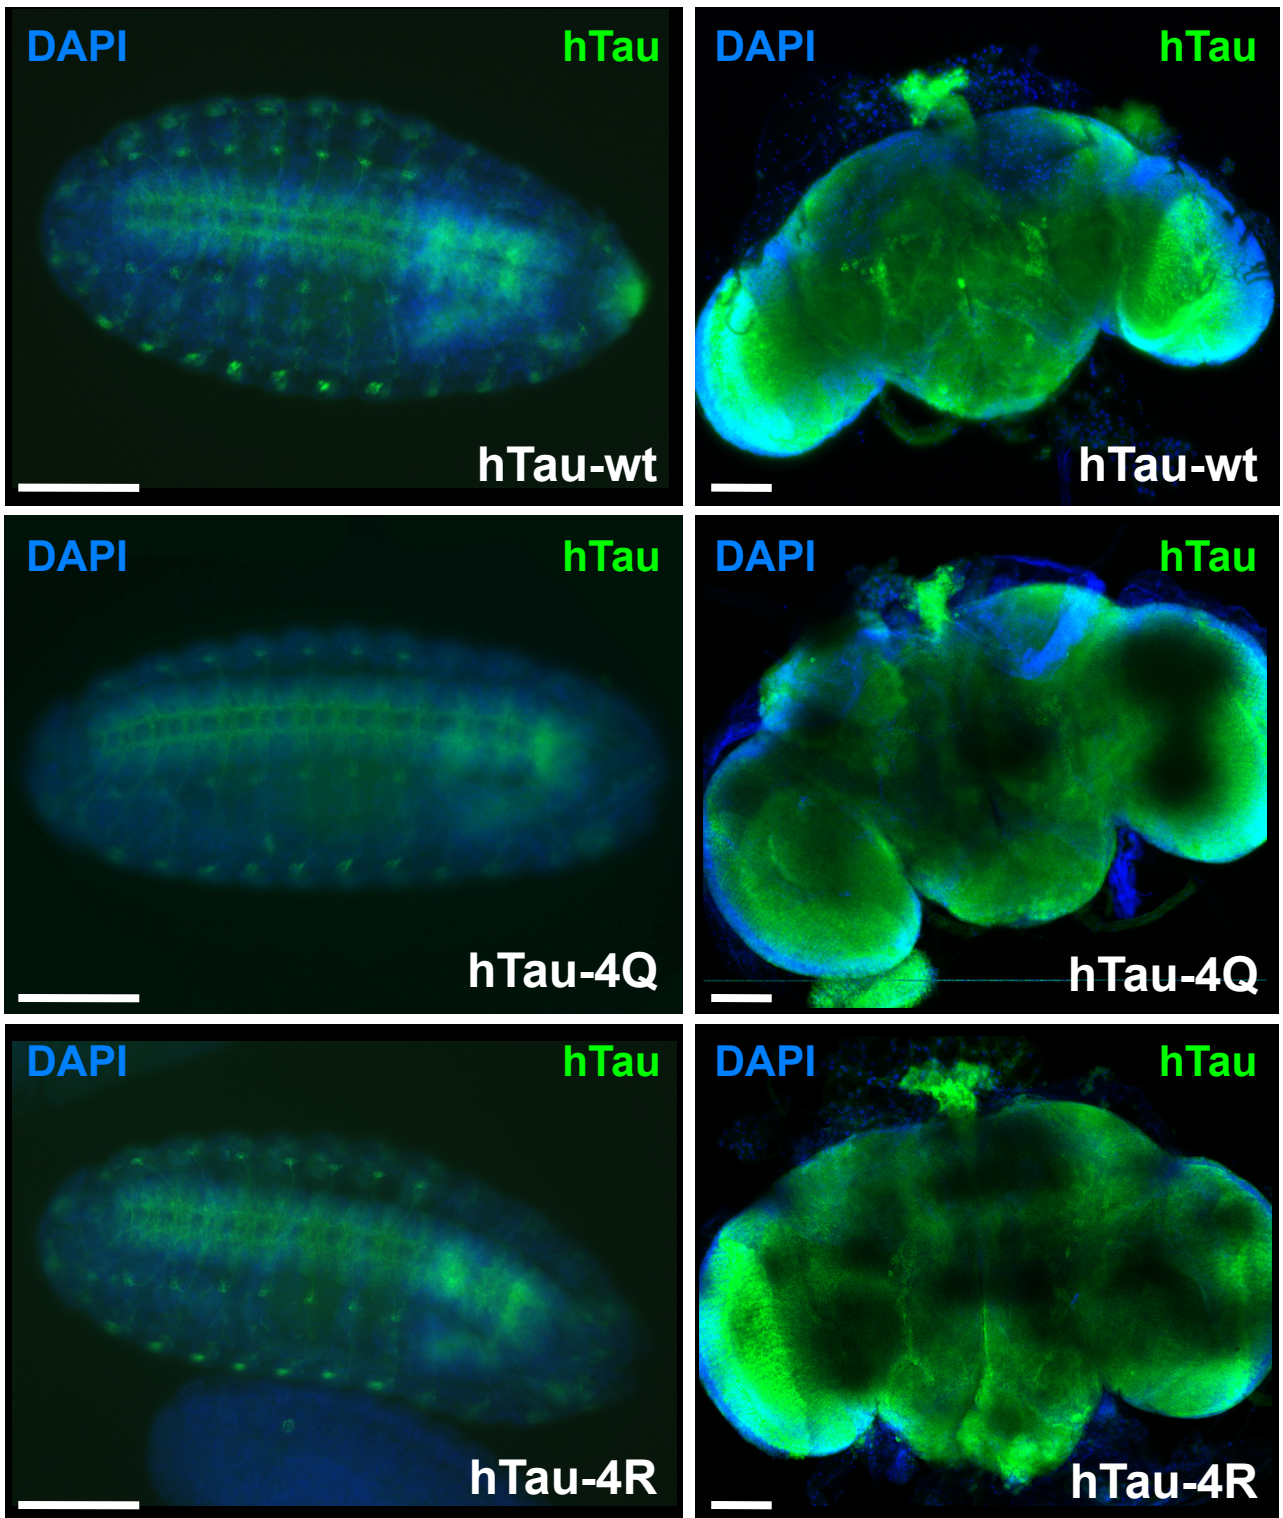

Supplementary Figure-9-Partridge. Mimicking multi-acetylation altered hTau phosphorylation pattern in 20-day-old flies.

**a**

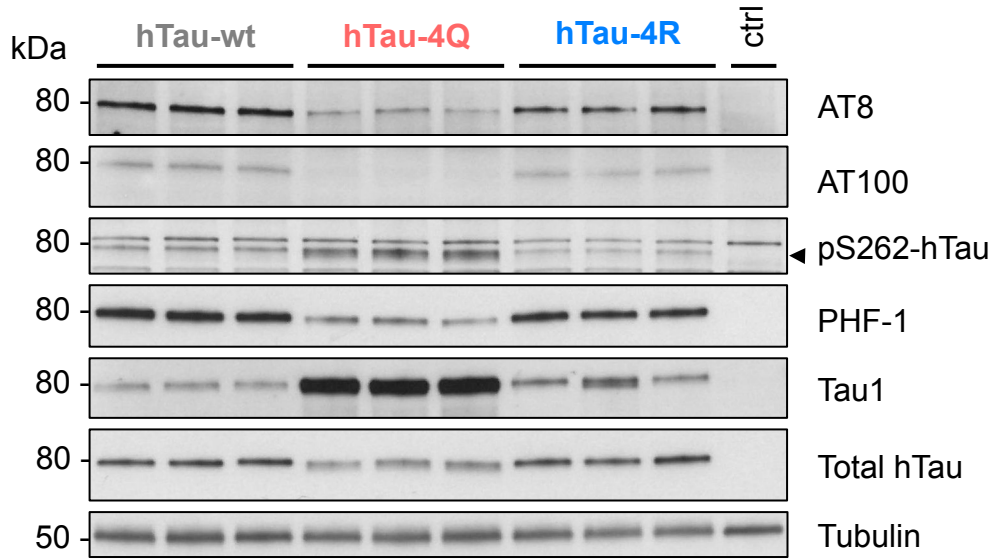

**b**

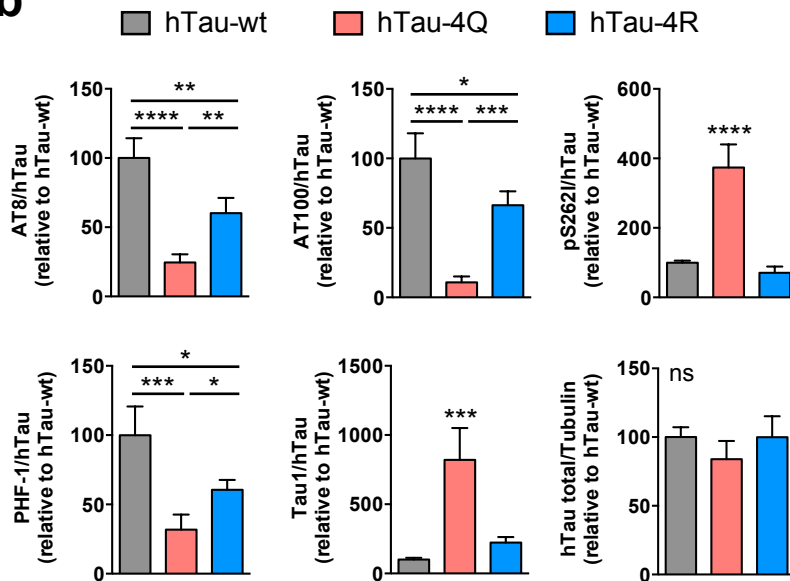

Supplementary Figure-10-Partridge. Evaluation of hTau phosphorylation pattern in hTau-wt, hTau-K280Q and hTau-K280R KI flies.

**a**

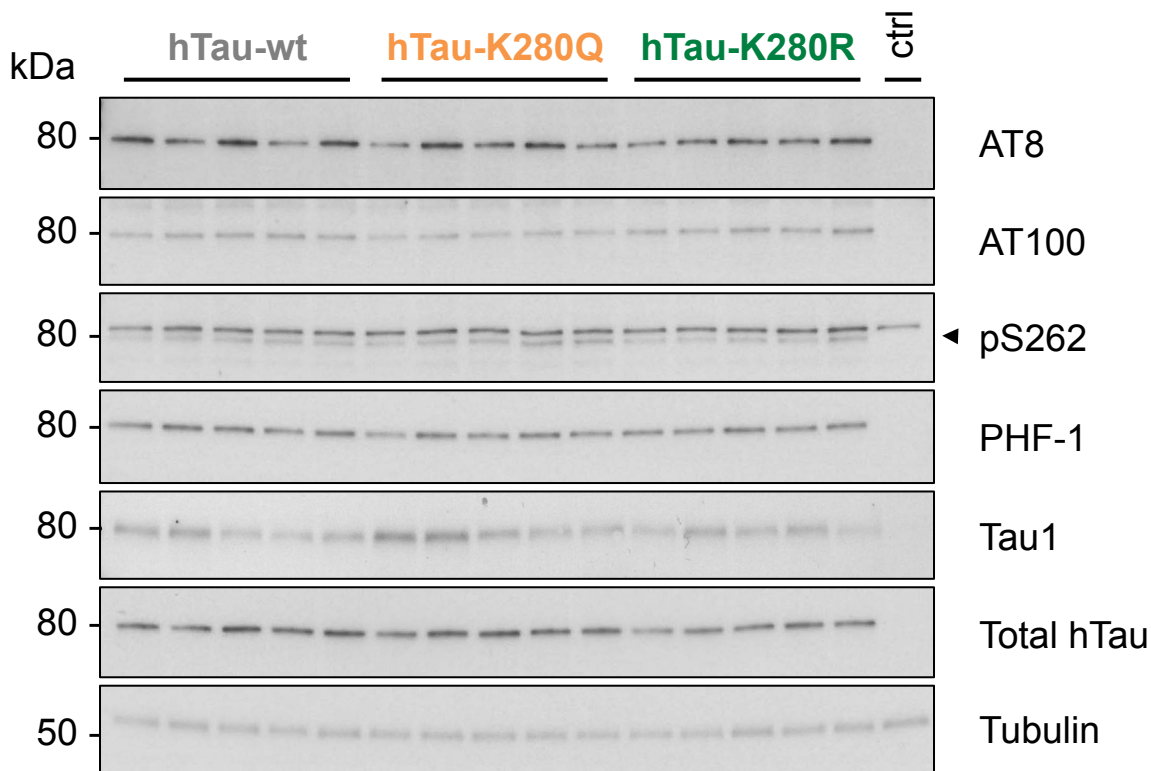

**b**

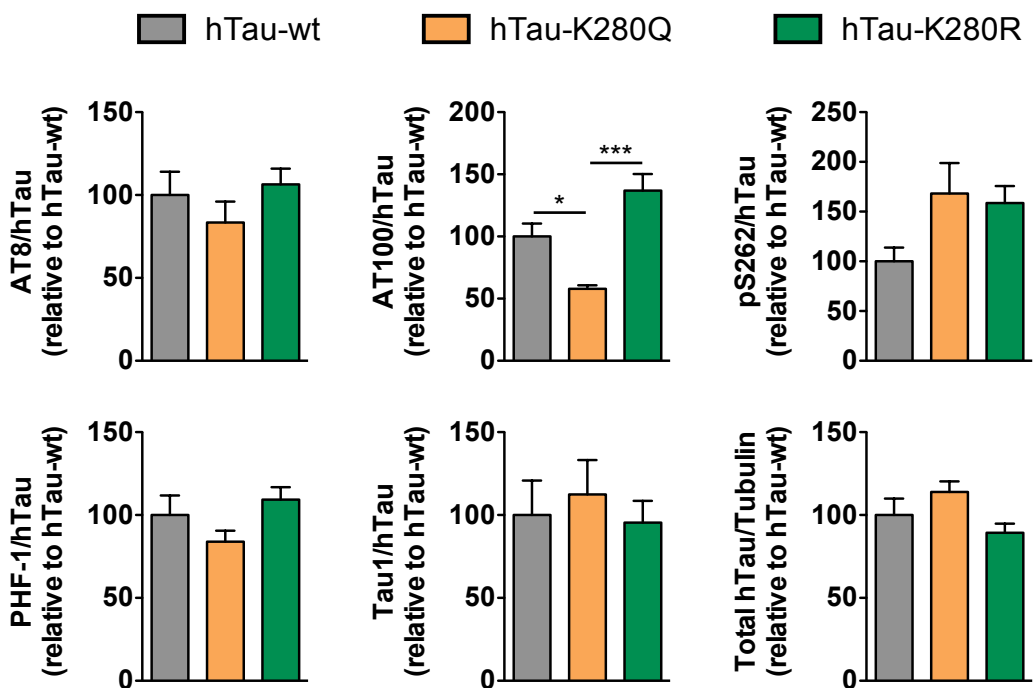

# Supplementary Figure-11-Partridge. Mimicking multi-acetylation did not affect hTau solubility

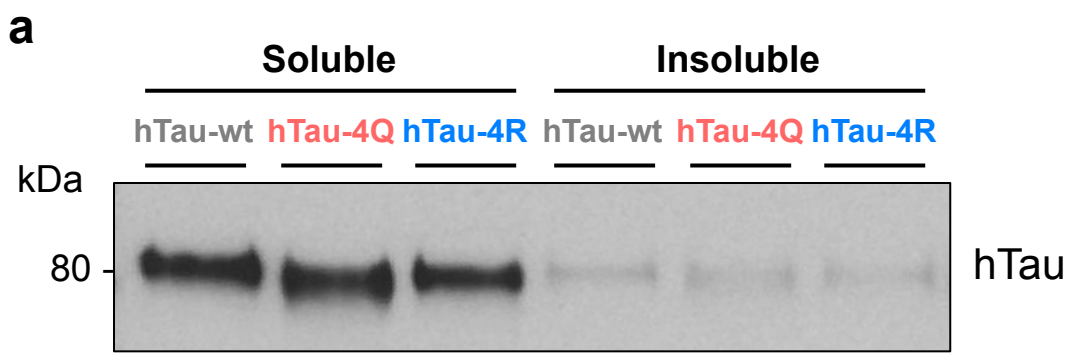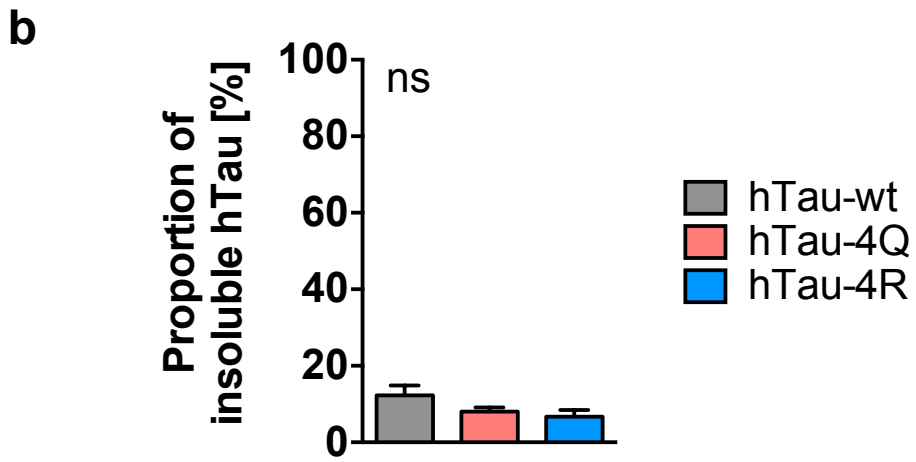

# Supplementary Figure-12-Partridge. Evaluation of Tubulin acetylation in hTau-wt, -4Q and -4R KI flies.

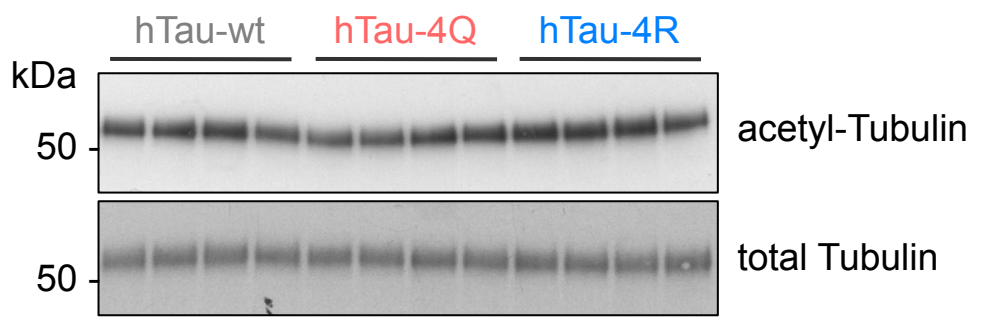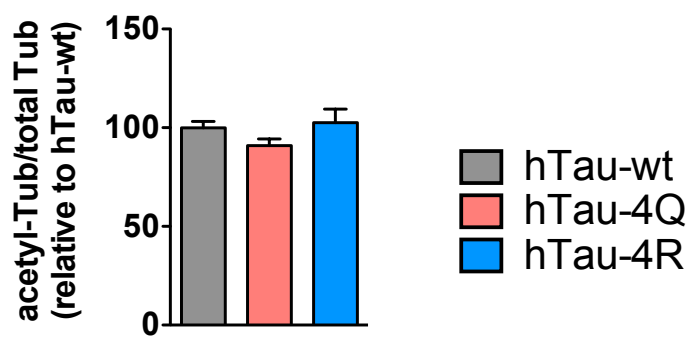

# Supplementary Figure-13-Partridge. hTau-K280Q KI proteins displayed unaltered microtubule-binding properties

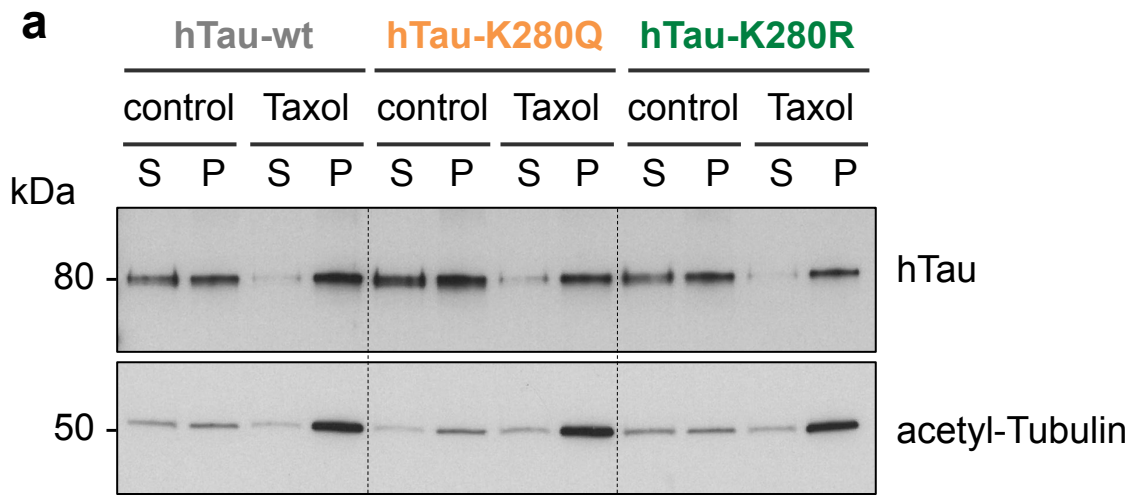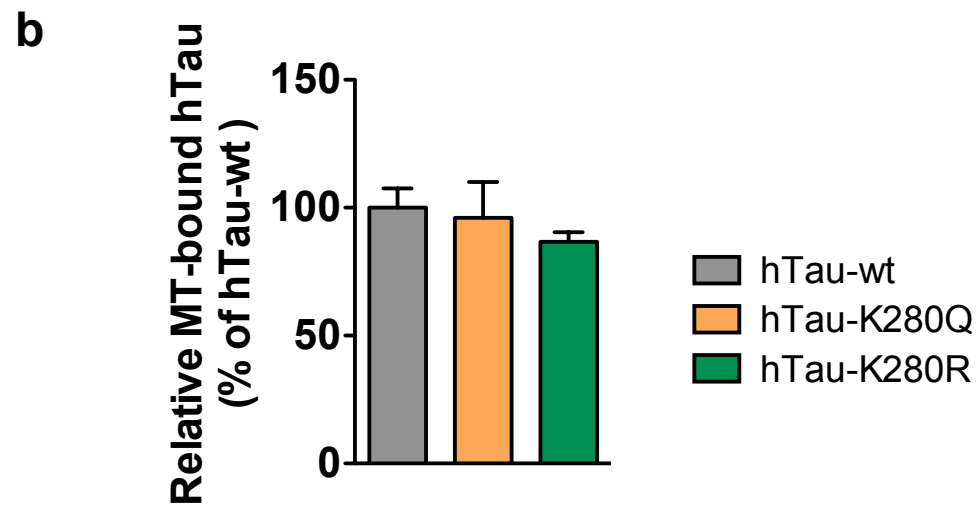

Supplementary Figure-14-Partridge. Evaluation of A $\beta$  levels in flies co-expressing A $\beta$  and homozygous hTau-wt, -4Q and -4R KI lines.

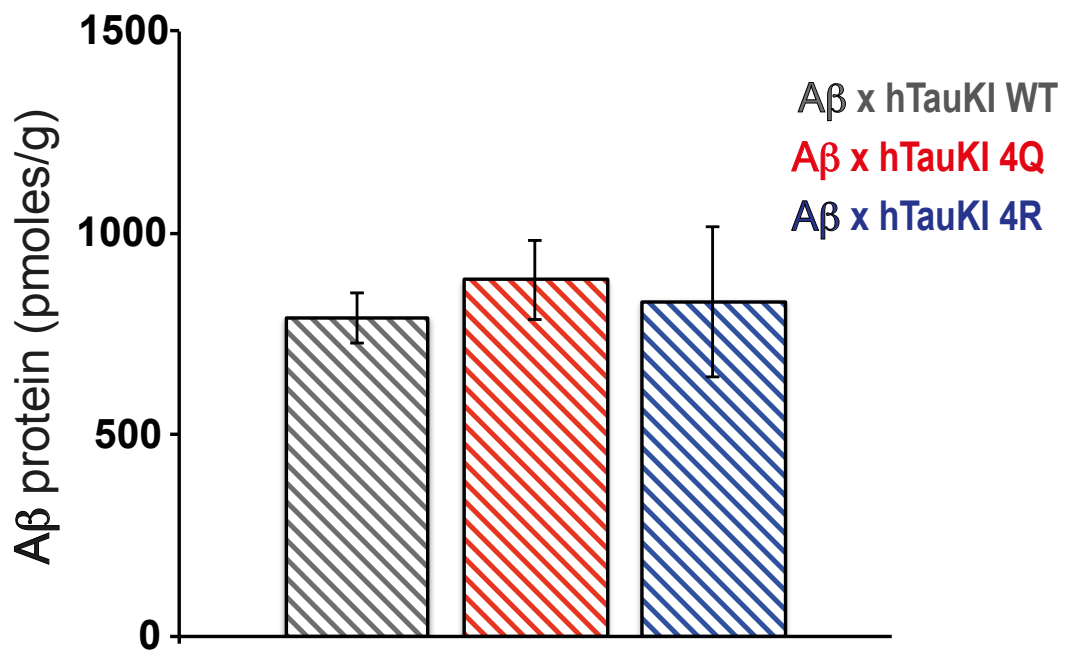

Supplementary figure 15 - Full blots from Figure 1

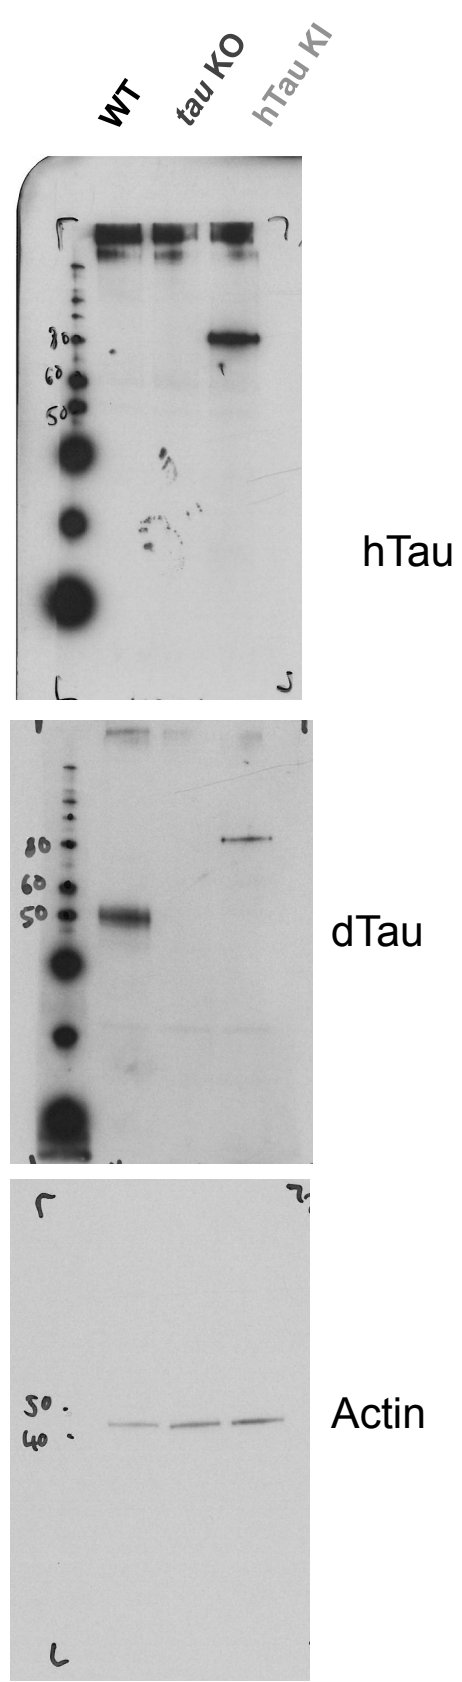



# Supplementary figure 16 - Full blots from Figure 3

**a**

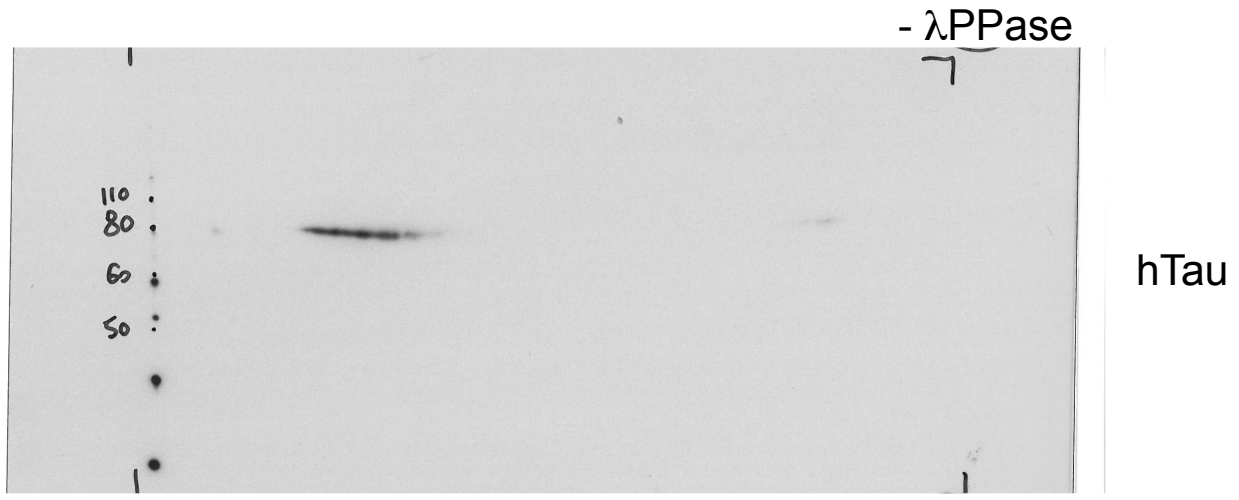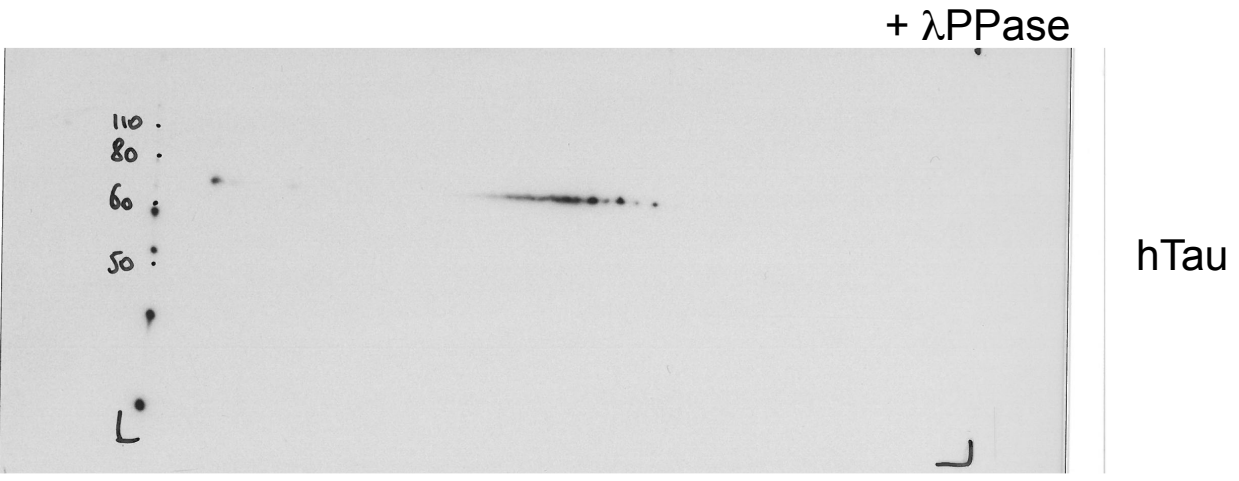

**b**

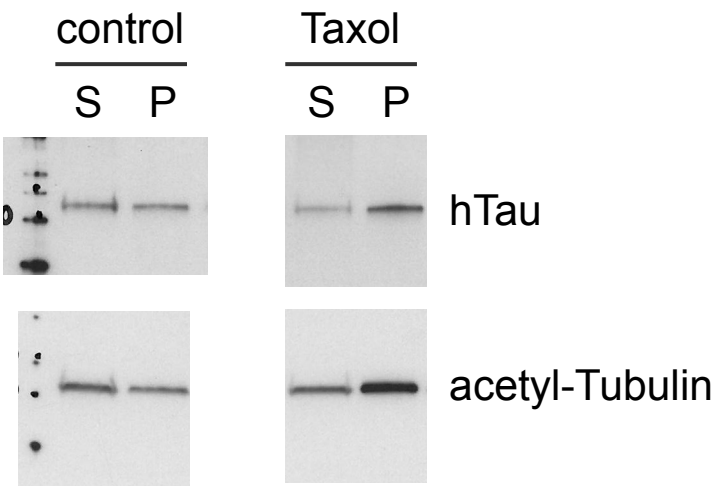

# Supplementary figure 17 - Full blots from Figure 5

| hTau KI |              | WT control |
|---------|--------------|------------|
| input   | IP hTau ctrl | IP hTau    |

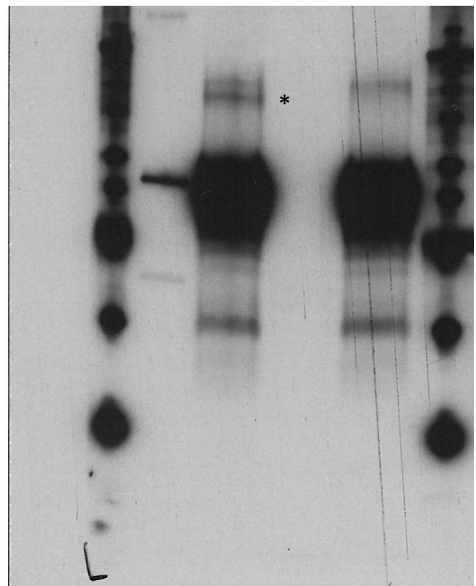

Acetylated lysines

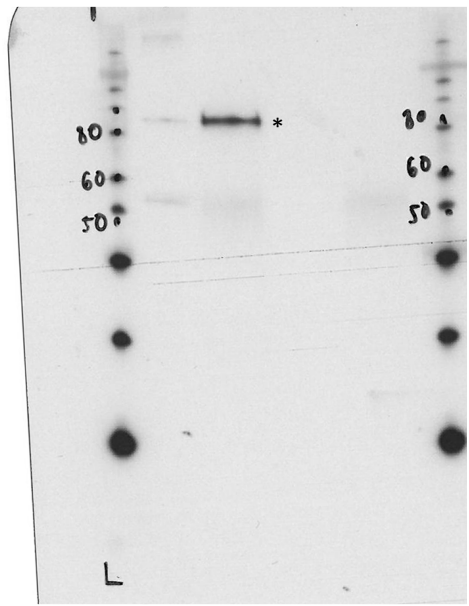

hTau

# Supplementary figure 18 - blots from Figure 6

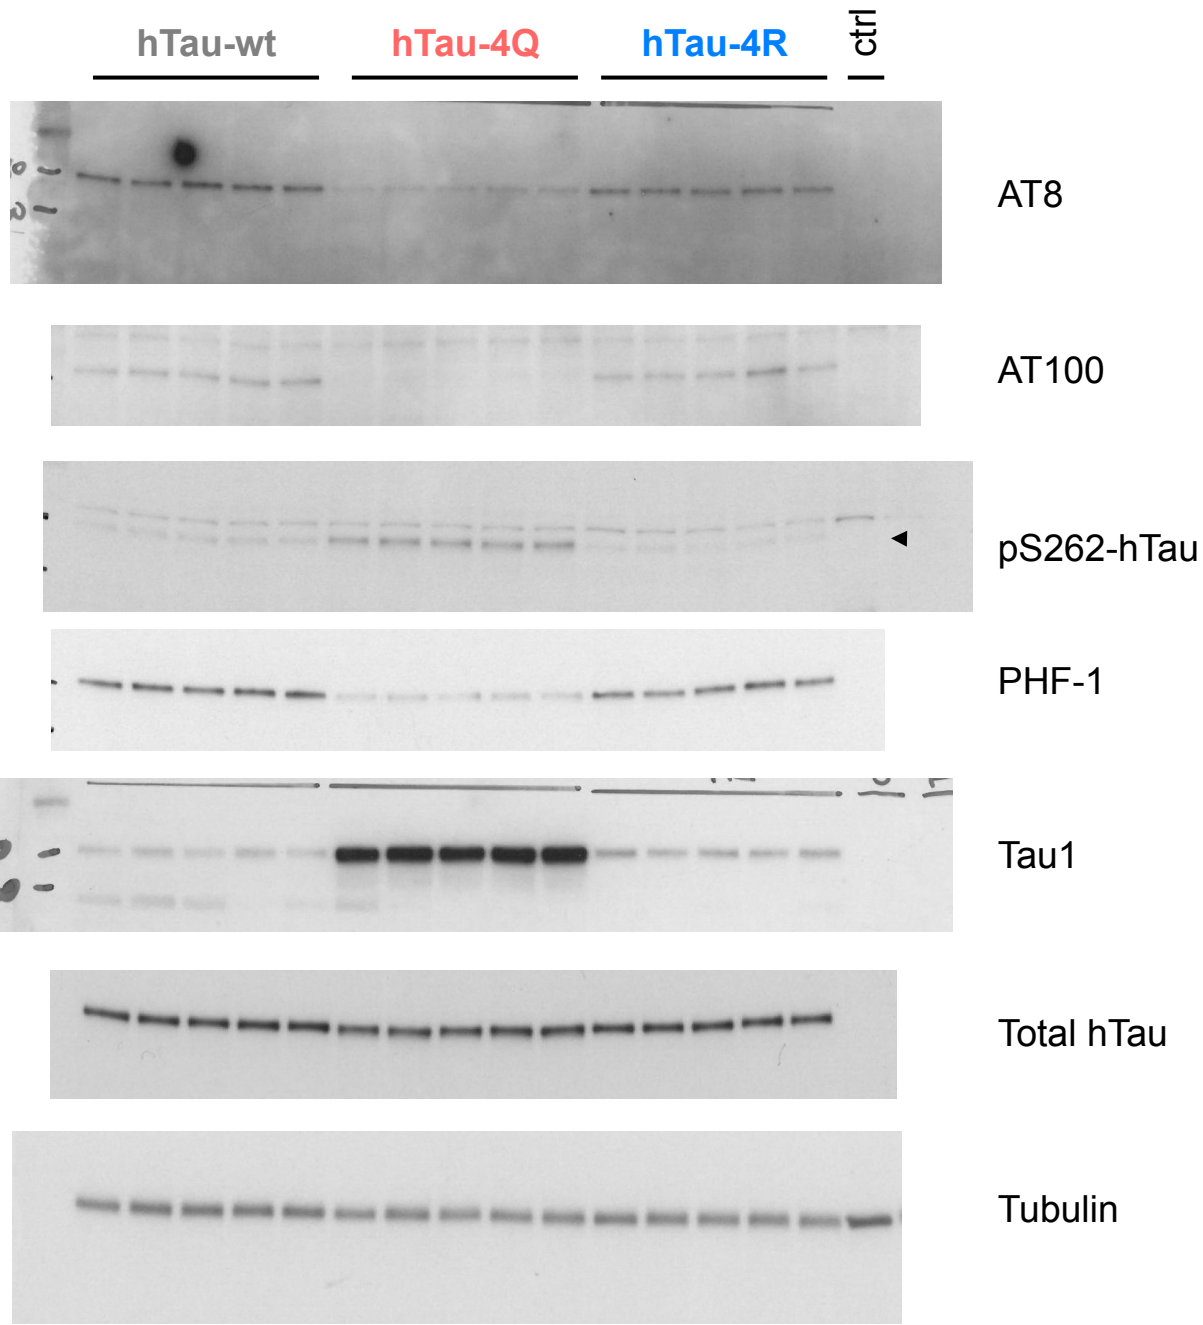

# Supplementary figure 19 - Full blots from Figure 7

| hTau-wt |       | hTau-4Q |       | hTau-4R |       |
|---------|-------|---------|-------|---------|-------|
| control | Taxol | control | Taxol | control | Taxol |
| S       | P     | S       | P     | S       | P     |

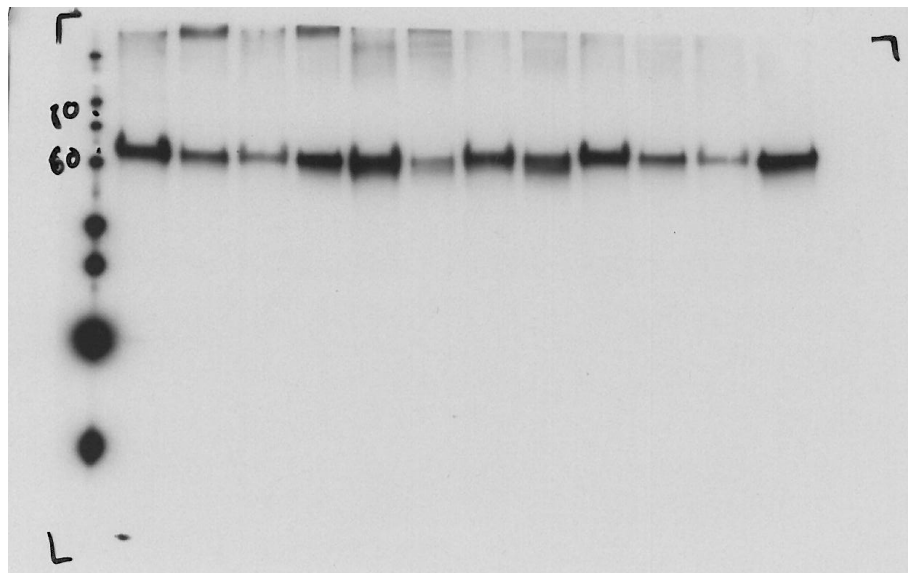

hTau (long exposure)

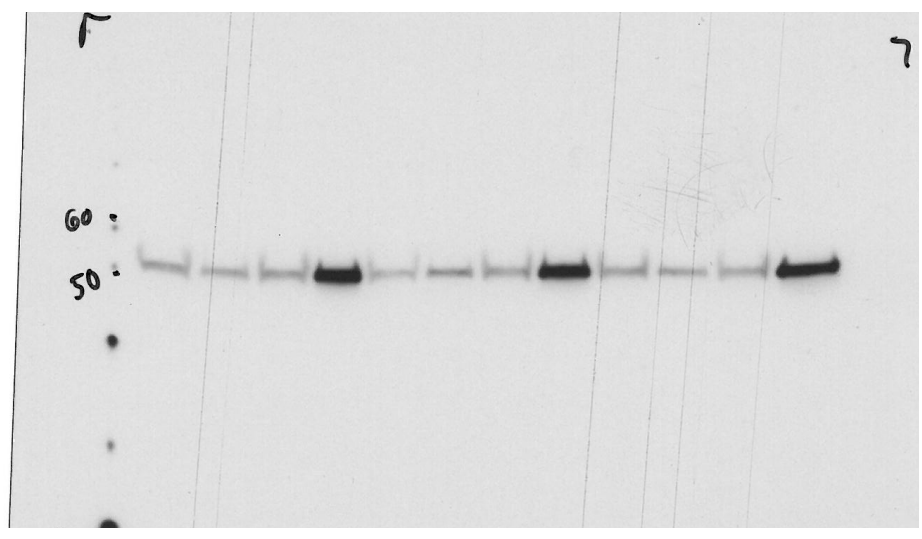

acetyl-Tubulin

# Supplementary figure 20 - blots from Figure 8

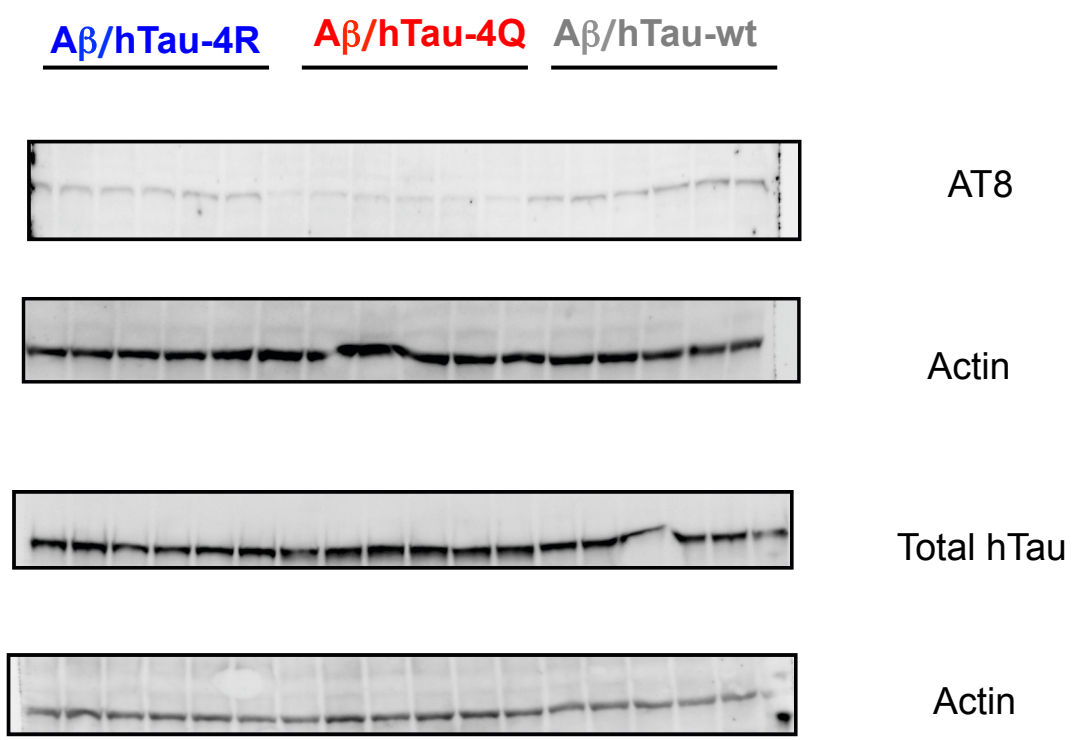

## SUPPLEMENTARY FIGURE LEGENDS

**Supplementary Figure 1. Genomic engineering of the fly *tau* locus.** **a.** A genomic engineering strategy combining ends-out homologous recombination, the use of a Cre recombinase and  $\phi$ C31-mediated integration of replacement constructs was used to generate the hTau KI lines. Ampr: Ampicilline resistance gene. **b.** Nucleotide sequence of the *tau* replacement insert used to reconstitute the fly *tau* locus. The hTau 2N4R cDNA is indicated in grey while *Drosophila tau* sequences are shown in purple. The lysine residues investigated in this study are indicated in blue.

**Supplementary Figure 2. Amino acid sequence of the hTau KI fusion protein.** The hTau 2N4R protein isoform (441 amino acids, grey) is fused to fly *tau* exon 1 (82 amino acids, purple). Lysines 163, 280, 281 and 369 are indicated in blue. The hTau KI fusion protein has a theoretical MW of 54.67 kDa and runs at the apparent MW of 80 kDa.

**Supplementary Figure 3. hTau KI proteins were expressed in brains of adult flies.** **a and b.** Immunofluorescence for hTau and dTau was performed on brains of adult hTau KI (**a**) and WT (**b**) flies, respectively, indicating that hTau was localised to the nervous system in adult flies. DAPI was used to stain cell nuclei (blue). **c and d.** Immunofluorescence against hTau (**c**) and dTau (**d**) proteins was performed in adult *tau* KO control fly brains, showing no Tau immunoreactivity (green) in this line. DAPI was used to stain cell nuclei (blue). Scale bar: 100  $\mu$ m.

**Supplementary Figure 4. Control experiments for hTau immunofluorescence on fly embryos.** Immunofluorescence on WT (**b**) and *tau* KO (**c**) control embryos showed no signal for hTau (green). The htau KI embryo is shown as a positive control (**a**). DAPI was used to stain cell nuclei (blue). Scale bar: 50  $\mu$ m.

**Supplementary Figure 5. Neuronal and synaptic protein levels were not altered in hTau KI flies.** Expression of neuronal (Elav) and synaptic (Synapsin and Syntaxin) proteins was not impaired in 20-day-old hTau KI flies as compared to age-matched WT controls ( $p > 0.05$ , Student's t-test). Results were normalised to Actin and expressed relative to levels measured in WT flies.

**Supplementary Figure 6. Schematic representation of hTau acetylation and phosphorylation sites investigated in this study.** hTau phosphorylation on S195/S198/S199/S202 (Tau1, binding to dephosphorylated hTau species) S202/T205 (AT8), T212/S214 (AT100), S262, and S396/S404 (PHF-1) was analysed following pseudo-acetylation or pseudo-deacetylation of hTau at K163, K280, K281 and K369 (hTau-4Q and hTau-4R, respectively).

**Supplementary Figure 7. hTau mRNA levels were comparable in all hTau KI lines.** hTau mRNA levels were measured by qRT-PCR in fly heads using a probe targeting either fly *tau* exon 1 (a), which is expressed in all investigated lines, or a common region on hTau sequence (b). WT flies are shown as a negative control for hTau expression. hTau-wt, -4Q and -4R KI flies expressed comparable levels of hTau transcripts ( $p > 0.05$ , one-way ANOVA).

**Supplementary Figure 8. Imaging of hTau expression in hTau-wt, -4Q and -4R embryos and adult brains.** hTau immunofluorescence (green) was performed on embryos (left panels) and adult brains (right panels) of hTau-wt, hTau-4Q and hTau-4R KI flies. DAPI was used to stain cell nuclei (blue). Scale bars: 100  $\mu\text{m}$ .

**Supplementary Figure 9. Mimicking multi-acetylation altered hTau phosphorylation pattern in 20-day-old flies.** Western blot analysis (a) and quantification (b) of hTau phosphorylation (AT8, AT100, anti-pS262-hTau, PHF-1 and Tau1 antibodies) and total hTau levels (polyclonal K9JA antibody) retrieved from head extracts of 20-day-old hTau-wt, hTau-4Q and hTau-4R KI flies. Results were normalized to Tubulin and to total hTau levels and expressed relative to the hTau-wt KI line ( $*p < 0.05$ ,  $**p < 0.01$ ,  $***p < 0.001$  and  $****p < 0.0001$ , one-way ANOVA followed by Tukey's post hoc test,  $n = 3/\text{genotype}$ ). Although total hTau levels retrieved from hTau-4Q fly heads appeared lower, imageJ quantification revealed similar hTau protein levels among the three mutants ( $p > 0.05$ , one-way ANOVA), the corresponding band being simply more diffuse in hTau-4Q samples.

**Supplementary Figure 10. Evaluation of hTau phosphorylation pattern in 2-day-old hTau-wt, hTau-K280Q and hTau-K280R KI flies.** Western blot analysis (a) and quantification (b) of hTau phosphorylation (AT8, AT100, anti-pS262-hTau, PHF-1 and Tau1 antibodies) and total hTau levels (polyclonal K9JA antibody) retrieved from head extracts of 2-day-old hTau-wt, hTau-K280Q and hTau-K280R KI flies. Results were normalized to Tubulin and to total hTau levels and expressed relative to the hTau-wt KI line ( $*p < 0.05$  and  $***p < 0.001$ , one-way ANOVA followed by Tukey's post hoc test,  $n = 5/\text{genotype}$ ).

**Supplementary Figure 11. Mimicking multi-acetylation did not affect hTau solubility.** **a.** Protein extracts from hTau KI fly heads were fractionated into RAB-soluble and RAB-insoluble/RIPA-1%SDS-soluble fractions and subsequently probed with an anti-hTau antibody (K9JA). **b.** Quantification of the proportion of insoluble hTau species observed in fly head extracts from hTau-wt, hTau-4Q and hTau-4R KI lines ( $p > 0.05$ , one-way ANOVA followed by Tukey's post hoc test,  $n = 4/\text{genotype}$ ).

**Supplementary Figure 12. Evaluation of Tubulin acetylation in hTau-wt, -4Q and -4R KI flies.** Western blot analysis indicated that levels of acetylated Tubulin retrieved from hTau-wt, hTau-4Q and hTau-4R KI fly heads were comparable ( $p > 0.05$ , one-way ANOVA). Results were normalised to total Tubulin and expressed relative to levels measured in hTau-wt KI flies.

**Supplementary Figure 13. hTau-K280Q KI proteins displayed unaltered microtubule-binding properties.** **a.** In vivo microtubule-binding assay was performed on protein extracts from 2-day-old hTau-wt, hTau-K280Q and hTau-K280R KI fly heads. Taxol was used to induce microtubule polymerisation, and DMSO, the vehicle, was used as a control. S: supernatant, P: pellet. **b.** Quantification of the proportion of microtubule-bound hTau proteins in hTau-wt, hTau-K280Q and hTau-K280R KI lines, in Taxol conditions. Results are expressed relative to levels measured in hTau-wt KI flies ( $p > 0.05$ , one-way ANOVA followed by Tukey's post hoc test,  $n = 3/\text{genotype}$ ).

**Supplementary Figure 14. A $\beta$  levels did not change across the different hTauKI lines.** Flies co-expressing arctic A $\beta$ 42 in combination with any of the homozygous hTau-wt, hTau-4Q and hTau-4R KI lines had similar levels of A $\beta$ 42 protein by ELISA analyses, ( $p > 0.05$ , one-way ANOVA followed by Tukey's post hoc test,  $n = 4/\text{genotype}$ ).

**Supplementary Figure 15. Full blots from Figure 1.**

**Supplementary Figure 16. Full blots from Figure 3.**

**Supplementary Figure 17. Full blots from Figure 5.**

**Supplementary Figure 18. Full blots from Figure 6.**

**Supplementary Figure 19. Full blots from Figure 7.**

**Supplementary Figure 20. Full blots from Figure 8.**
